# Supplementary material for: Estimates of Dietary Exposure to Antibiotics among a Community Population in East China
Source: MDPI journal article supplement (doi:10.3390/antibiotics11030407), 2022-03-17
Supplement: s1 [file s1]

## Supplementary materials

### Estimates of dietary exposure to antibiotics among a community population in East China

**Yingying Wang <sup>1,†</sup>, Xinping Zhao <sup>1,†</sup>, Jinxin Zang <sup>1,†</sup>, Yurong Li <sup>1</sup>, Xiaolian Dong <sup>2</sup>, Feng Jiang <sup>1</sup>, Na Wang <sup>1,‡</sup>, Lufang Jiang <sup>1</sup>, Qingwu Jiang <sup>1</sup> and Chaowei Fu**

**<sup>1,‡</sup>**

<sup>1</sup>.School of Public Health; Key Laboratory of Public Health Safety; NHC Key Laboratory of Health Technology Assessment, Fudan University, Shanghai, 200032, China;

<sup>2</sup>.Deqing County Center for Disease Prevention and Control, Huzhou, 550004, China.

† These authors contributed equally: Yingying Wang, Xinping Zhao, Jinxin Zang.

\* Correspondence: Na Wang, E-mail: na.wang@fudan.edu.cn; Chaowei Fu, E-mail:fcw@fudan.edu.cn.

**Table S1 Detection concentrations of selected twenty-one antibiotics in animal-derived foods from the notification of unqualified edible agricultural products after special supervision sampling inspection in Deqing County**

| Antibiotics       | Usage <sup>a</sup> | Food categories and detection concentrations                                                                                                                                                                                                                 |
|-------------------|--------------------|--------------------------------------------------------------------------------------------------------------------------------------------------------------------------------------------------------------------------------------------------------------|
| Tetracyclines     |                    |                                                                                                                                                                                                                                                              |
| Tetracycline      | H/VA               | prawn (553 µg/kg)                                                                                                                                                                                                                                            |
| Oxytetracycline   | H/VA               | beef (320 µg/kg), chicken (342 µg/kg), prawn (289 µg/kg), prawn (497 µg/kg), prawn (379 µg/kg), prawn (440 µg/kg), prawn (102 µg/kg)                                                                                                                         |
| Chlortetracycline | VA                 | -                                                                                                                                                                                                                                                            |
| Fluoroquinolones  |                    |                                                                                                                                                                                                                                                              |
| Ciprofloxacin     | H/VA               | -                                                                                                                                                                                                                                                            |
| Ofloxacin         | H/VA               | snakehead (42.8 µg/kg), snakehead (8.55 µg/kg), large yellow croaker (21.7 µg/kg), small yellow croaker (68.4 µg/kg), bull frog (35.8 µg/kg)                                                                                                                 |
| Norfloxacin       | H/VA               | -                                                                                                                                                                                                                                                            |
| Enrofloxacin      | VA                 | crucian (1400 µg/kg), crucian (267 µg/kg), weever (1600 µg/kg), butterflyfish (240 µg/kg), butterflyfish (1600 µg/kg), prawn (498 µg/kg), prawn (250 µg/kg), swamp ell (2636.4 µg/kg), bull frog (655.8 µg/kg), bull frog (577 µg/kg), bull frog (270 µg/kg) |
| Macrolides        |                    |                                                                                                                                                                                                                                                              |
| Azithromycin      | HA                 | -                                                                                                                                                                                                                                                            |
| Roxithromycin     | HA                 | -                                                                                                                                                                                                                                                            |
| Clarithromycin    | HA                 | -                                                                                                                                                                                                                                                            |
| Erythromycin      | H/VA               | -                                                                                                                                                                                                                                                            |
| Tilmicosin        | VA                 | -                                                                                                                                                                                                                                                            |
| Sulfonamides      |                    |                                                                                                                                                                                                                                                              |
| Trimethoprim      | H/VA               | chicken (288 µg/kg), chicken (69.0 µg/kg), snakehead (82.7µg/kg)                                                                                                                                                                                             |
| Sulfadiazine      | H/VA               | -                                                                                                                                                                                                                                                            |
| Sulfamethoxazole  | H/VA               | -                                                                                                                                                                                                                                                            |
| Sulfamethazine    | H/VA               | pork (136 µg/kg), chicken (907 µg/kg), chicken (819 µg/kg), large yellow croaker (145 µg/kg), prawn (457µg/kg), chicken egg (64.6 µg/kg)                                                                                                                     |

|                             |      |                                                                                                                        |
|-----------------------------|------|------------------------------------------------------------------------------------------------------------------------|
| Acetylated sulfamethoxazole | H/VA | -                                                                                                                      |
| Acetylated sulfamethazine   | H/VA | -                                                                                                                      |
| Phenicol                    |      |                                                                                                                        |
| Chloramphenicol             | HA   | beef (0.52 µg/kg), gizzard (1.07 µg/kg), sausage (0.8 µg/kg), crucian (4.4 µg/kg), clam (4.5 µg/kg), clam (11.4 µg/kg) |
| Thiamphenicol               | H/VA | duck egg (0.2µg/kg), quail egg (0.5 µg/kg)                                                                             |
| Florfenicol                 | VA   | chicken egg (5.3 µg/kg), chicken egg (78.9 µg/kg), duck egg (8.88 µg/kg), duck egg (13.5µg/kg), duck egg (48.6µg/kg),  |

---

<sup>a</sup> Usage: VA, veterinary antibiotic exclusively used in animal; HA, human antibiotic exclusively used in human; H/VA, human/veterinary antibiotic used in both animal and human.
